# Supplementary material for: Quantified effect of seawater biogeochemistry on the temperature dependence of sea spray aerosol fluxes
Source: Copernicus journal article supplement (doi:10.5194/acp-2022-790), 2023-01-17
Supplement: Supplementary file [file acp-2022-790-AC1-supplement.pdf]

## Answers to Reviewer1's comments

We thank reviewer 1 for his/her constructive comments that we feel we have well addressed. Reviewer's comments are in black while our answers are in blue.

This paper presents measurements of sea spray aerosol particle number size distributions and calculated fluxes for particles produced from four different water masses during one sampling period. Surface tension measurements were done on water samples at different temperatures, and relationships between sea spray flux and water temperature are presented for the different water masses. This work is put in the context of previous work and relates the nanophytoplankton numbers to cloud condensation nuclei as well. Overall, this paper is interesting and relevant. Understanding sea spray production flux as a function of water temperature will be a good contribution to global modeling. There are some areas of the paper that can be improved, mostly through clarification of the methods and presentation of the results. Some general and specific comments are noted below.

### General

The abstract states that future changes in seawater temperature will be important with climate change. In that case, why were such low temperatures chosen for the experiments? 2°C is outside of the range of the ambient temperatures measured (13-15°C). It would be helpful to have a comment on the global distribution of current sea surface temperatures and how they may change. For example, what fraction of the world's ocean has a sea surface temperature at 2°C? How will that change in the future?

The temperature range investigated is representative of a large fraction of the global oceans and in particular temperatures of 2°C and lower are observed at latitudes higher than 45° for both poles (Bopp et al. 2013), exactly where modelling exercises struggle to represent cloud occurrences and properties.

We now specify this in the introduction:

*"We investigate the temperature dependence of sea-spray aerosols generated from natural seawater of contrasting water masses of the South-Western Pacific Ocean over a temperature gradient equivalent to the 25-yr average summer seawater temperature range of the Southern Ocean (Auger et al. 2021) and relate this to the biogeochemical properties of the surface water"*

How sea surface temperature may change was mentioned in the conclusion:

*"The IPCC report estimates an increase in average ocean surface temperature by 2.5 ° C by 2100, with consequences for marine biology (Bindoff et al. 2019) and future projections for the South-West Pacific also indicate a +2.5°C increase in surface temperature by the end of the century with consequences for marine microbes and biogeochemistry (Law et al, 2018)."*

Is it physically relevant to cool these specific water masses to 2°C? The statement made in the Conclusions is not fully supported. This study cooled ambient water, and many other factors will change with a warming ocean. It would have been more relevant to warm up the ambient water or present a larger range of temperatures.

The aim of our experiments is the study of the dependence of SSA fluxes on biologically produced chemicals that have differing physical macroproperties (surface tension, density, viscosity) at different temperatures. Temperature gradients applied over an hour provide a snapshot of the physical dependence of fluxes on these variables, the hypothesis being that biology does not change within this hour.

We agree with the reviewer that studying SSA flux temperature dependence is useful at higher temperatures for predicting atmospheric aerosol concentration over oceans in the future. We also acknowledge that these relationships may be less applicable under a future climate because of many other factors, including change or acclimation of microbial groups to new temperature ranges. This is exactly what we discuss in the conclusion: how biology may change in a future climate, which *in turn*, will impact the spatial and seasonal temperature-related variability of SSA fluxes. Note that we provide a temperature dependent parameterization of SSA fluxes *as a function of the phytoplankton functional group*. Also note our conclusion that the complex question of the impact of climate change on SSA fluxes can only be addressed using Earth System Models.

*“Potential changes in the abundance of Synechococcus spp. in response to temperature changes associated with climate change, and the resulting impact on CCN fluxes to the atmosphere and cloud formation should be investigated using regional models run under future climate conditions, to account for other climate-sensitive factors that influence sea spray fluxes.”*

The Methods should contain more details on the experiments and calculations, as mentioned below in the Specific Comments. There are some pieces in the Results and Discussion that should be moved into the Methods (i.e., the calculation of FCCN). Additionally, while references are included, there are some places that could use more explanation in the calculations. It also seems unnecessary to use “CCN” when it is simply defined as all particles over 100 nm. That could just be stated as its own variable.

We follow all suggestions here and detail changes we made in answer to specific comments below

Could you add some comments on how the temperature of the air would affect the particle number flux? The air temperature may influence the lifetime of the bubble at the surface. Would a large gradient in the temperature from the surface of the seawater to the air change the lifetime of the bubbles at the sea surface? What air temperature were these experiments done at? Was the air temperature in the headspace held constant, or was the whole system cooled?

Air temperature relative to the seawater temperature is indeed important for bubble lifetime, particularly via its relation to the air RH, which impacts bubble film evaporation rate and therefore bubble lifetime. Our experiments were performed with ambient air temperature and therefore relatively constant air temperature and RH. Hence there is likely a change in the evaporation rate as the SST is decreased.

We have added a discussion on impact of RH in the main text, section 3.3.

*“Our experiments were performed with ambient air temperature and therefore relatively constant air temperature and RH of the incoming flushing air. Hence there is likely a change in the evaporation rate of the bubble film when the SST is decreased. However, the lower the SST in comparison to the air temperature above, the lower the evaporation of the film would be. Moreover, film thinning due to evaporation becomes more important relative to film thinning due to drainage only for very thin films (Miguet et al. 2021). In our system it is likely that bubbles films are broken by external forces before they reach these very thin films at which evaporation matters (below 1 micrometer for millimetric bubbles, achieved after a lifetime of several 10s of seconds, Miguet et al. 2021).”*

More text needs to be included discussing role of different factors on the surface tensions measured. The temperature at the time of measurement affects the surface tension, as stated. Additionally, salt concentrations in the water can change the surface tension as well. Because these are different water masses, it is likely that their salinities also change. Reporting a total surface tension might not be relevant, unless it is in the context of these changes in temperature and salinity.

We now address this in the revised text:

*“Given that both salinity and temperature influence surface tension, we performed a sensitivity test on the potential impact of salinity on the differences in surface tension observed for different seawater types. Salinity ranges of the different seawater types were 34.2-34.4 g L<sup>-1</sup> in SAW, 34.4-34.8 g L<sup>-1</sup> in frontal and mixed seawaters, 34.8-35.3 g L<sup>-1</sup> in STW and 34.4-34.8 g L<sup>-1</sup> in mixed seawaters. We calculate that these salinity ranges correspond to ideal surface tension ranges of seawater at 15°C (Nayar et al. 2014) of 74.500-74.502 nN m<sup>-1</sup> in SAW, 74.502-74.514 nN m<sup>-1</sup> in frontal and mixed seawaters and 74.514-74.523 nN m<sup>-1</sup> in STW. Consequently, there is negligible impact on surface tension within the range of salinities observed.”*

The discussion of the different biological factors influencing the particle flux at lower temperatures needs to be clarified. These are not necessarily species that would live at these temperatures. And it seems like any surfactants that would be in the water would have already been emitted at the ambient temperature. Is it possible that these species could die at these temperatures and then emit more surfactants or organics? Some more discussion of this would be useful.

Synechococcus spp. occur at a wide temperature range from 0 to 30°C but favour conditions around 10°C on a global scale (Flombaum et al., 2013, doi:10.1073/pnas.1307701110). While low temperature can induce stress in Synechococcus spp. acclimated at higher temperatures, differences occurring in metabolite production would be expected over the course of several hours (therefore over longer times than those of our experiments), while lowered temperatures are hypothesized to immediately slow down metabolic rates (Guyet et al., 2020, doi: doi.org/10.3389/fmicb.2020.01707). We therefore expect a relatively stable concentration and composition of organic matter and cell abundance during the application

of the temperature ramp and SSA flux measurements. As a consequence, the effect of lowered temperature on SSA fluxes is due to a physical impact of temperature on the bubble bursting mechanism in a solution that has the same biological and chemical composition.

We now include this discussion section 3.3

Towards the end of the paper, it is stated that the bubble films are more stable at colder temperatures due to the stabilization from surfactants. Why would there be more stabilization of surfactants at colder temperatures? This implies there are more or different surfactants when the temperature is changed.

Thanks for pointing this inconsistency. Different surfactants do not have different sensitivities to temperature, as now pointed out in answer to the previous comment. We added a discussion in section 3.3

*“The slope of surface tension to temperature does not differ from one sample to the other. This is expected as the Eötvös’ equation states that the temperature dependance of the surface tension is the same for almost all liquids. SST-dependance of the evaporation rates should also be the same for all samples. One relevant variable that has varied with temperature in relation to the chemical composition of the solution is viscosity. Viscosity sensitivity to temperature depends not only on the concentration of organics but also on the ionic strength of the solution (pH, salinity), and it also increases exponentially with decreasing temperature (Mallet et al. 2020). An increase of viscosity implies an increase of the characteristic viscous time which leads to the decrease of the bubble film thinning rate (drainage) (Miguët et al. 2021). Bubble average lifetimes were found to be very sensitive to viscosity, especially when impurities are present (Miguët et al. 2021). Therefore, observed differences in thermal behaviours between seawater types would possibly be explained by differences in the sensitivity of different organic’s viscosity to temperature. “*

The Results and Discussion section is somewhat short and could use more discussion of what these results mean. Some sections as mentioned below, could use more support for the statements. The Conclusions section starts as more of a discussion that could be moved up to the Results and Discussion. It would be better to have the key findings summarized in the Conclusions, and it should be clear what was measured in this study. The comparisons to the previous studies could be discussed in the previous section.

Thanks to the different comments received on this manuscript we significantly extended the Results and Discussion sections. We wish to leave the last section with some discussion, to put the main results together within a general framework. We renamed the section “concluding remarks” instead of conclusion.

### Specific Comments

Line 105: Nothing to change. Just noting that March 2020 must have been an extra stressful time to be on a research cruise, and it is great that you were still able to finish the cruise and complete the experiments.

Thanks, we also consider ourselves lucky 😊

Line 121: FCCN is used in this sentence but has not yet been defined. Because it is defined later, it might be better to remove it from this sentence, or move the definition up. It seems like “F” is for “flux”, but that should be stated explicitly here. And sub-scripting the “CCN” or not, should be consistent.

We now define and use FCN100 instead, as suggested.

Line 122: Please expand this sentence. It is unclear what two fluxes are being compared. It is interesting and relevant that the wind speeds are related to the air entrainment in the plunging jet system. It would be helpful to have the wind speeds and corresponding flow rates that were used written out here.

This is now described in the method section:

*“The flux of SSA was calculated from the SSA total number concentration, as follows:*

$$F_{tot} (\# m^{-2} s^{-1}) = \frac{CN_{tot} * Q_{flush}}{S_{tank}} \quad (1)$$

*where  $CN_{tot}$  is the concentration of SSA measured from the MAGIC CPC,  $Q_{flush}$  is the flushing air flowrate inside the tank’s headspace, and  $S_{tank}$  is the surface of seawater inside the tank. In Sellegri et al. (2021), hereafter referred to as SELL21, the concentration of > 100 nm particles was used as a proxy for CCN concentration. For comparison to SELL21 we also calculated fluxes of SSA larger than 100 nm. The flux of CN100 ( $F_{CN100}$ ) was calculated in a similar manner to Equation (1):*

$$F_{CN100} (\# m^{-2} s^{-1}) = \frac{CN_{100} * Q_{flush}}{S_{tank}} \quad (2)$$

*where  $CN_{100}$  is the concentration of SSA with a diameter larger than 100 nm. Calibration experiments performed following the procedure of Salter et al. (2014), enabled to established that the air entrainment flowrate in our system is 4.5  $Lair \text{ min}^{-1}$  under the jet operational condition (seawater flowrate of 1.25  $L \text{ min}^{-1}$ , orifices’ diameters, jet distance to seawater surface). According to Long et al. (2011), the flux of air entrained ( $F_{ent}$ ) during wave breaking can be related to a wind speed at 10 m ( $U_{10}$ ) following:*

$$F_{ent} = 2 * 10^{-8} U_{10}^{3,74} \quad (3)$$

*Given that, we calculate that our plunging jet system simulated a bubble volume distribution equivalent to that produced at a wind speed of 9  $m \text{ s}^{-1}$ . For the data acquired with a seawater flowrate that deviated from 1.25  $L \text{ min}^{-1}$ , fluxes were normalized to the 9  $m \text{ s}^{-1}$  equivalent windspeed with the following relationship:*

$$F_{normalized} = F_{original} * \frac{1.25^{2.4}}{Q_{SW}^{2.4}} \quad (4)$$

*Where  $Q_{sw}$  is the seawater flowrate. Equation (4) was obtained by varying  $Q_{sw}$  over a short period (less than an hour) and fitting the flux dependence to  $Q_{sw}$ . Normalization resulted in less than 30% change in the fluxes for 80% of the data.”*

Line 127: It would be helpful to have more details on the surface tension measurements. Were these all done on board the ship, with fresh seawater, directly after sampling? How did the ship movement contribute to any uncertainties in these measurements? What volume of sample was collected for the temperature gradient experiments? Were these mixed to ensure a constant temperature throughout the sample?

Volume of samples were described in the text, and we now specify that the surface tension measurements were performed on board the ship directly after sampling:

*“The temperature gradient for surface tension measurements was achieved on board the ship on fresh seawater samples by first freezing 25 ml seawater sampled in Falcon tubes, with surface tension measured while the sample slowly warmed to ambient temperature; this took less than one hour which limited the time for any seawater biogeochemistry changes to occur.”*

For this small volume there is no need for mixing as the temperature is homogeneous in the small glass bucket used for the analysis. The vibration of the ship may have influenced surface tension measurements, leading to the spread in measurements observed in Figure 4, however the uncertainty on measurements due to this effect is difficult to assess. We do not use surface tension measurement for their absolute value, but rather interpreted the sensitivity of these measurements to temperature and differences between seawater types qualitatively.

Line 132: How were the samples in the 10L carboys stored to prevent changes in the chemistry and biology? Please add more details on the aliquots and their storage prior to analyses. Were these analyzed on board the ship or later in the laboratory?

Sample bottles were either processed immediately or stored in the dark in ENGEL portable fridge/freezers units at in situ temperature for the water mass (max. operating temperature: 9°C) and processed within 8 hrs of collection. Sample volumes for filtering were determined from the Ecotriplet fluorescence data noted during sample collection. All biogeochemical analysis were performed on land post-voyage.

This is now specified in the method section.

Line 166: The paragraph prior to this line could be moved into the Methods section. This is mainly describing the water masses that were sampled and their dates. Starting at Line 166, there are some results from the measurements.

We followed the reviewer suggestion

Line 176: Add more explanation on how all of the particles greater than 100 nm can be considered CCN at 0.2% supersaturation.

We added more explanation in the method section and now refer to this section line 176. Note that there was a typing mistake and N100 correspond to CCN number concentrations at 0.1% supersaturation.

Figure 1 should be improved. The y-axis labels all appear to be stretched. The panels should be merged together into one figure, with one common x-axis. The shading and labels are nice to have. It would be helpful if this figure also had sea surface temperature and salinity. Maybe b and c could be combined, and SST could be added to a on the right axis. In d, why are there more surface tension markers than flux markers? Because the flux was calculated from the size distributions which were measured continuously, it seems like those could be at higher resolution or the same resolution as the surface tension. Error bars should also be added to these markers, especially the flux and the surface tension, to see any overlap in variability. (Also, change “STT” to “SST” in caption.)

Figure 1 was changed so that the variables of interest of the different seawater types could be statistically compared to one another.

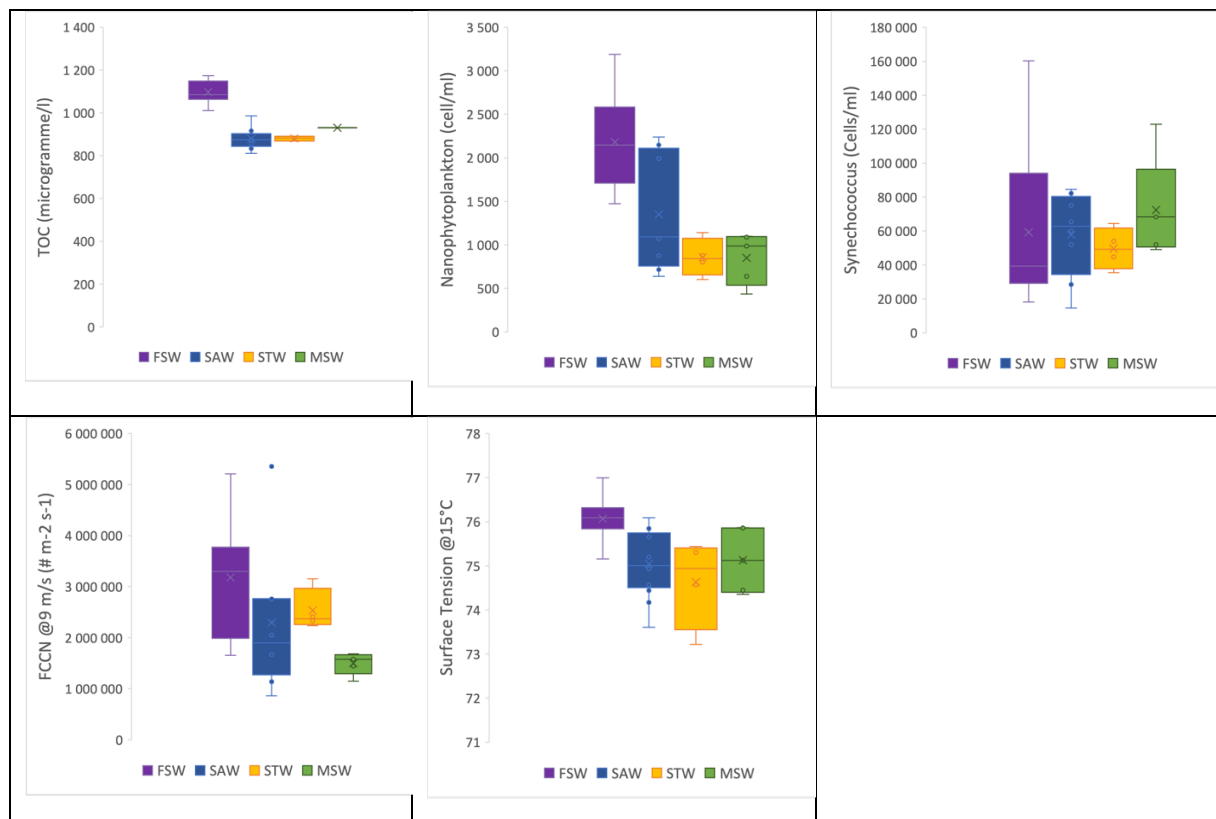

In Figure 2 it is not clear what are measurements from this study and those from previous studies. The text states that there are four other datasets, but I do not see markers for the Sea2Cloud data. “SO” needs to be defined as well. If that is the Sea2Cloud data, then I am



not sure what the fifth dataset is that is referenced in the text. Overall, the caption could be a little more descriptive.

It is now specified that SO corresponds to the Sea2Cloud data set in now Figure 3's caption.

Line 190: I think this equation and all of the description of the FCCN calculations should be moved up into the methods. It would be helpful to have just an FCCN equation as well.

This is done

Line 202: This should be Figure 3.

Yes, we corrected this

Figures 3, 4, and 5 could be combined into a multi-panel figure, since they all have the same x-axis. Figures 3 and 5 should be combined, since they both contain sea spray flux as a function of temperature. It would be easier to compare the figures if they were together.

We follow the reviewer's suggestion but kept former Figures 3 and 5 separate. Figures 3 and 5 are difficult to merge into one figure because they do not have the same units and if plotted with a secondary y axis they would overlap too much.

Line 266: Interesting result that there is a shift in the shape of the size distribution.

Figure 6 needs a legend to describe the different colors. Additionally, some of the marker colors do not match the line colors (i.e., black dashed line with orange x's). It would be useful to have the same color scheme as Figure 7, to be consistent.

Corrected

Line 283: Can you add a little more description on the calculations going into Figure 7. It seems like it would be interesting to compare the Dp values shown in Table 1 for both temperature ranges.

We added the following text to better explain how now Figure 6 was done:

*"The slope of the linear fit between modal concentration and temperature gives the relative increase of each modal concentration per SST degree, relative to its 8-10 °C modal concentration. The linear fit was performed for each mode and each daily temperature experiment. Statistics for all experiments are shown Figure 6."*

And comment Table 1:

*"We observe an average 15% decrease of the modal diameters at the low temperatures compared to moderate temperatures which is consistent for all modes (Table 1)."*

Line 294: This explanation is not consistent. Why would there be higher concentrations of surfactant in colder waters that would further stabilize the bubble film? Surfactant



concentration is not the only thing contributing to the surface tension and thus bubble lifetime.

See our answer above . We copy it here again:

Thanks for pointing this inconsistency. Different surfactants do not have different sensitivities to temperature, as now pointed out in answer to the previous comment. We added a discussion in section 3.3

*“The slope of surface tension to temperature does not differ from one sample to the other. This is expected as the Eötvös’ equation states that the temperature dependence of the surface tension is the same for almost all liquids. SST-dependence of the evaporation rates should also be the same for all samples. One relevant variable that has varied with temperature in relation to the chemical composition of the solution is viscosity. Viscosity sensitivity to temperature depends not only on the concentration of organics but also on the ionic strength of the solution (pH, salinity), and it also increases exponentially with decreasing temperature (Mallet et al. 2020). An increase of viscosity implies an increase of the characteristic viscous time which leads to the decrease of the bubble film thinning rate (drainage) (Miguet et al. 2021). Bubble average lifetimes were found to be very sensitive to viscosity, especially when impurities are present (Miguet et al. 2021). Therefore, observed differences in thermal behaviours between seawater types would possibly be explained by differences in the sensitivity of different organic’s viscosity to temperature. “*

Line 348: More explanation is needed to make this claim. It is not entirely clear that the results of this study support the idea that with a warmer ocean, there will be less sea spray flux. The temperatures measured here were colder than ambient. In order to make this statement, it would have been better to warm the water instead. There are a lot of factors that will change in a warming climate, so this needs to be clarified.

Citation: <https://doi.org/10.5194/acp-2022-790-RC1>

See our answer above. We copy it here again:

The aim of our experiments is the study of the dependence of SSA fluxes on biologically produced chemicals that have differing physical macroproperties (surface tension, density, viscosity) at different temperatures. Temperature gradients applied over an hour provide a snapshot of the physical dependence of fluxes on these variables, the hypothesis being that biology does not change within this hour.

We agree with the reviewer that studying SSA flux temperature dependence is useful at higher temperatures for predicting atmospheric aerosol concentration over oceans in the future. We also acknowledge that these relationships may be less applicable under a future climate because of many other factors, including change or acclimation of microbial groups to new temperature ranges. This is exactly what we discuss in the conclusion: how biology may change in a future climate, which *in turn*, will impact the spatial and seasonal temperature-related variability of SSA fluxes. Note that we provide a temperature dependent parameterization of SSA fluxes *as a function of the phytoplankton functional*

*group*. Also note our conclusion that the complex question of the impact of climate change on SSA fluxes can only be addressed using Earth System Models.

*“Potential changes in the abundance of Synechococcus spp. in response to temperature changes associated with climate change, and the resulting impact on CCN fluxes to the atmosphere and cloud formation should be investigated using regional models run under future climate conditions, to account for other climate-sensitive factors that influence sea spray fluxes.”*

About warming instead of cooling:

The temperature range investigated is representative of a large fraction of the global oceans and in particular temperatures of 2°C and lower are observed at latitudes higher than 45° for both poles (Bopp et al. 2013), exactly where modelling exercises struggle to represent cloud occurrences and properties.

We now specify this in the introduction:

*“we investigate the temperature dependence of sea-spray aerosols generated from natural seawater of contrasting water masses of the South-Western Pacific Ocean over a temperature gradient equivalent to the 25-yr average summer seawater temperature range of the Southern Ocean (Auger et al. 2021) and relate this to the biogeochemical properties of the surface water”*
